# Supplementary material
Source: publisher figshare collection journal article supplement (https://acs.figshare.com/ndownloader/files/5079835)
Supplement: Supplementary file 1 [file 5079835]

# SUPPORTING INFORMATION

## Enantioselective Synthesis of Vicinal Halohydrins *via* Dynamic Kinetic Resolution

Abel Ros, Antonio Magriz, Hansjörg Dietrich, Rosario Fernández, Eleuterio

Alvarez, and José M. Lassaletta

**General experimental methods.** Solvents were purified and dried by standard procedures. Flash chromatography was carried out on silica-gel (0.040-0.063 mm or 0.015-0.040 mm). Melting points were recorded in a metal block and are uncorrected.  $^1\text{H}$  NMR spectra were recorded at 300 MHz, 400 MHz or 500 MHz;  $^{13}\text{C}$  NMR spectra were recorded at 75 MHz, 100 MHz or 125 MHz with the solvent peak used as the internal reference;  $^{19}\text{F}$  NMR{ $^1\text{H}$ } spectra were recorded at 377 MHz with  $\text{CF}_3\text{CO}_2\text{H}$  as external reference. The diastereomeric excesses (de) of the products were determined by  $^1\text{H}$  NMR and  $^{19}\text{F}$  NMR and the enantiomeric excesses (ee) by HPLC on chiral stationary phases with  $^i\text{PrOH}$ /hexane mixtures as the eluent. Mixtures of enantiomers required as references were prepared by mixing products obtained independently with (*R,R*)-I and (*S,S*)-I. The catalysts were synthesized according to described procedures.<sup>1</sup>

### Transfer Hydrogenation of $\alpha$ -Halo Ketones.

**Method A.** To a solution of catalyst (*R,R*)-I or (*S,S*)-I (0.01 mmol) in  $\text{HCO}_2\text{H}/\text{Et}_3\text{N}$  mixture was added the  $\alpha$ -haloketone (2 mmol) and the mixture was stirred at room temperature until

---

(1) (a) A. Fujii, S. Hashiguchi, N. Uematsu, T. Ikariya, R. Noyori, *J. Am. Chem. Soc.* **1996**, *118*, 2521-2522. (b) K. Haack, S. Hashiguchi, A. Fujii, T. Ikariya, R. Noyori, *Angew. Chem. Int. Ed. Engl.* **1997**, *36*, 285-288.

completion. The reaction mixture was then diluted with CH<sub>2</sub>Cl<sub>2</sub> (20 mL) and washed with a satd. solution of HNaCO<sub>3</sub> (2 × 15 mL). The organic layer was dried and concentrated, and the residue was purified by flash chromatography

**Method B.** To a solution of the catalyst (*R,R*-**I** or (*S,S*)-**I** (0.004-0.02 mmol), HCO<sub>2</sub>Na (1.36 g, 20 mmol) and Bu<sub>4</sub>NBr (2-30%) in a 1:1 H<sub>2</sub>O/CH<sub>2</sub>Cl<sub>2</sub> mixture (4-8 mL) was added the α-halo ketone (4 mmol) and the mixture was stirred at room temperature for 4-6 days. The reaction was then diluted with CH<sub>2</sub>Cl<sub>2</sub> (10 mL), and the aqueous layer was extracted with CH<sub>2</sub>Cl<sub>2</sub> (2 × 10 mL). The combined organic layer was dried and concentrated, and the residue was purified by flash chromatography.

Starting material, method used for the synthesis, catalyst, eluants, yields and spectral and analytical data for compounds **6-9**, **12**, **13**, and **18-21** are as follows:

**(1*R*,2*S*)-2-Bromoindan-1-ol (6).**

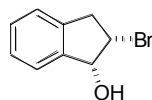

From 2-bromoindan-1-one **1**<sup>2</sup> (845 mg, 4 mmol) and following the method **B** with (*S,S*)-**I** as the catalyst; flash chromatography (1:8 EtOAc-hexane) gave 715 mg (84%) of **6** (>98% de, 99% ee) as a white solid: M.p. = 109-111 °C. [ $\alpha$ ]<sub>D</sub><sup>20</sup> +59.4 (c 0.8, CHCl<sub>3</sub>) [Lit.<sup>3</sup>: (1*S*,2*R*)-**6**: [ $\alpha$ ]<sub>D</sub><sup>25</sup> -61.0 (c 0.62, CHCl<sub>3</sub>)]. <sup>1</sup>H NMR (400 MHz, CDCl<sub>3</sub>) δ 2.45 (d, 1H, *J* = 9.6 Hz), 3.35 (dd, 1H, *J* = 16.8, 3.2 Hz), 3.33 (dd, 1H, *J* = 16.8, 5.2 Hz), 4.90 (m, 1H), 4.96 (dd, 1H, *J* = 9.6, 4.8 Hz), 7.23-7.45 (m, 4H); <sup>13</sup>C NMR (75 MHz, CDCl<sub>3</sub>) δ 40.5, 61.1, 76.6, 124.9, 125.3, 127.8, 129.0, 139.5, 141.9; mass spectrum (EI) *m/z* (rel intensity) 214 (M<sup>+</sup>, 5), 212 (M<sup>+</sup>, 5),

(2) H. M. Meshram, P. N. Reddy, K. Sadashiv, J. S. Yadav, *Tetrahedron Lett.* **2005**, *46*, 623-626.

(3) Bowers, N. I.; Boyd, D. R.; Sharma, N. D.; Goodrich, P. A.; Grocock, M. R.; Blacker, A. J.; Goode, P.; Dalton, H. J. *Chem. Soc., Perkins Trans 1*, **1999**, 1453-1461.

195 (17), 133 (100). HRMS calcd for C<sub>9</sub>H<sub>9</sub>OBr 213.9816 and 211.9837, found 213.9815 and 211.9832.

HPLC (Chiracel OB, 2-propanol/hexane 8:92, flow = 1 mL/min, T = 40 °C): t<sub>R</sub> (1*S*,2*R*)-**6**, 7.17 min; (1*R*,2*S*)-**6**, 8.79 min.

**(1*S*,2*R*)-2-Chloroindan-1-ol (7).**

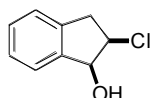

From 2-chloroindan-1-one **2** (330 mg, 2 mmol) and following the method **A** with 2:1 HCO<sub>2</sub>H/Et<sub>3</sub>N mixture and (*R,R*)-**I** as the catalyst; flash chromatography (1:8 EtOAc-hexane) gave 282 mg (83%) of **7** (>98% de, 99% ee) as a white solid: M.p. = 110-112 °C. [α]<sup>20</sup><sub>D</sub> -51.5 (c 0.9, CHCl<sub>3</sub>) [Lit.<sup>3</sup> [α]<sup>25</sup><sub>D</sub> -52.0 (c 0.6, CHCl<sub>3</sub>)]. <sup>1</sup>H NMR (500 MHz, CDCl<sub>3</sub>) δ 2.52 (d, 1H, *J* = 9.5 Hz), 3.25 (dd, 1H, *J* = 17.0, 3.5 Hz), 3.33 (dd, 1H, *J* = 17.0, 5.5 Hz), 4.79 (td, 1H, *J* = 5.5, 3.5 Hz), 5.14 (dd, 1H, *J* = 9.5, 5.5 Hz), 7.23-7.45 (m, 4H); <sup>13</sup>C NMR (125 MHz, CDCl<sub>3</sub>) δ 39.7, 66.0, 76.4, 124.7, 125.1, 127.5, 128.8, 138.9, 141.5; mass spectrum (EI) *m/z* (rel intensity) 170 (M<sup>+</sup>, 10), 168 (M<sup>+</sup>, 40), 169 (35), 167 (100). HRMS calcd for C<sub>9</sub>H<sub>9</sub>OCl 168.0342, found 168.0344.

HPLC (Chiracel OB, 2-propanol/hexane 10:90, flow 1 mL/min, T = 30 °C): t<sub>R</sub> (1*S*,2*R*)-**7**, 7.50 min; (1*R*,2*S*)-**6**, 9.88 min.

**(1*R*,2*S*)-2-Bromo-1,2,3,4-tetrahydro-naphthalen-1-ol (8).**

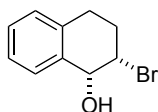

From 2-bromotetral-1-one **3** (900 mg, 4 mmol) and following the modified method **B** (using 384 mg, 30% mol of Bu<sub>4</sub>NBr) with (S,S)-**I** as the catalyst; flash chromatography (1:10 EtOAc-hexane) gave 580 mg (64%) of **8** (>98% de, 96% ee) as a white solid: M. p. = 98-100 °C.  $[\alpha]_D^{20} +7.25$  (c 0.8, CHCl<sub>3</sub>) <sup>1</sup>H NMR (400 MHz, CDCl<sub>3</sub>) δ 2.28 (m, 1H), 2.39 (d, 1H, *J* = 8.0 Hz), 2.50 (m, 1H), 2.85 (dt, 1H, *J* = 17.2, 6.8 Hz), 3.09 (dt, 1H, *J* = 17.2, 6.8 Hz), 4.69 (dt, 1H, *J* = 8.4, 3.2 Hz), 4.78 (d, 1H, *J* = 8.0 Hz), 7.09-7.47 (m, 4H); <sup>13</sup>C NMR (75 MHz, CDCl<sub>3</sub>) δ 27.8, 28.6, 58.8, 70.4, 126.8, 128.5, 128.8, 128.9, 134.9, 136.3; mass spectrum (EI) *m/z* (rel intensity) 228 (M<sup>+</sup>, 4), 226 (M<sup>+</sup>, 4) (100), 147 (100), 129 (77). HRMS calcd for C<sub>10</sub>H<sub>11</sub>OBr 227.9973 and 225.9993, found 227.9966 and 225.9995.

HPLC (Chiracel OB, 2-propanol/hexane 1:99, flow 1 mL/min, T = 30 °C): *t*<sub>R</sub> (1*R*,2*S*)-**8**, 23.74 min; (1*S*,2*R*)-**8** 29.46 min.

The opposite (1*S*,2*R*)-**8** enantiomer, obtained as above but using (*R,R*)-**I** as the catalyst, was crystallized from CH<sub>2</sub>Cl<sub>2</sub>-hexane and its absolute configuration was determined by single-crystal X-ray diffractometry.

#### (1*S*,2*R*)-2-Chloro-1,2,3,4-tetrahydro-naphthalen-1-ol (**9**).

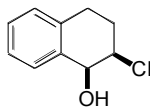

From 2-chlorotetral-1-one **4**<sup>2</sup> (360 mg, 2 mmol) and following the method **A** with 1.2:1 HCO<sub>2</sub>H/Et<sub>3</sub>N mixture and (*R,R*)-**I** as the catalyst; flash chromatography (1:14 EtOAc-hexane) gave 258 mg (71%) of **9** (>98% de, 99% ee) as a white solid: M. p. = 90-92 °C.  $[\alpha]_D^{20} -8.2$  (c 0.8, CHCl<sub>3</sub>) <sup>1</sup>H NMR (500 MHz, CDCl<sub>3</sub>) δ 2.18 (dtd, 1H, *J* = 14.0, 7.0, 3.0 Hz), 2.37-2.44 (m, 2H), 2.82 (dt, 1H, *J* = 17.5, 7.0 Hz), 3.09 (dt, 1H, *J* = 17.0, 7.0 Hz), 4.53 (d, 1H, *J* = 9.0, 3.0 Hz), 4.83 (d, 1H, *J* = 3.0 Hz), 7.10-7.48 (m, 4H); <sup>13</sup>C NMR (125 MHz,

CDCl<sub>3</sub>)  $\delta$  26.7, 27.6, 63.3, 70.1, 126.5, 128.2, 128.6, 128.9, 134.9, 135.8; mass spectrum (EI)  $m/z$  (rel intensity) 184 ( $M^+$ , 10), 182 ( $M^+$ , 36) (100), 167 (14), 165 (50), 129 (100). HRMS calcd for C<sub>10</sub>H<sub>11</sub>OCl 182.0498, found 182.0496.

HPLC (Chiracel OB, 2-propanol/hexane 10:90, flow 1 mL/min, T = 30 °C):  $t_R$  (1*S*,2*R*)-**9**, 7.60 min; (1*R*,2*S*)-**9**, 10.09 min.

**(1*S*,2*R*)-2-Fluoroindan-1-ol (12).**

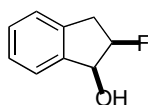

From 2-fluoroindan-1-one **10**<sup>4</sup> (300 mg, 2 mmol) and following the method **A** with 1.2:1 HCO<sub>2</sub>H/Et<sub>3</sub>N mixture and (*R,R*)-**I** as the catalyst; flash chromatography (1:8 EtOAc-hexane) gave 280 mg (92%) of **12** (>98% de, 92% ee) as a white solid: M.p. = 98-100 °C.  $[\alpha]_D^{20}$  -67.4 (c 0.8, CHCl<sub>3</sub>) <sup>1</sup>H NMR (500 MHz, CDCl<sub>3</sub>)  $\delta$  2.42 (d, 1H,  $J$  = 9.5 Hz), 3.09 (ddd, 1H,  $J_{H,F}$  = 34.5 Hz,  $J$  = 17.0, 4.5 Hz), 3.21 (dd, 1H,  $J_{H,F}$  = 22.5 Hz,  $J$  = 17.0 Hz), 5.10 (ddd, 1H,  $J_{H,F}$  = 18.5 Hz,  $J$  = 9.5, 4.5 Hz), 5.29 (dtd, 1H,  $J_{H,F}$  = 54.0 Hz,  $J$  = 4.5, 1.5 Hz), 7.23-7.47 (m, 4H); <sup>13</sup>C NMR (125 MHz, CDCl<sub>3</sub>)  $\delta$  36.7 (d,  $J_{C,F}$  = 22.0 Hz), 76.4 ( $J_{C,F}$  = 18.0 Hz), 94.4 ( $J_{C,F}$  = 180.0 Hz), 124.6, 125.2, 127.5, 128.8, 138.4, 141.6; <sup>19</sup>F{<sup>1</sup>H} NMR (377 MHz, CDCl<sub>3</sub>)  $\delta$  -125.1; mass spectrum (EI)  $m/z$  (rel intensity) 152 ( $M^+$ , 37), 151 (13), 135 (100), 91 (16). HRMS calcd for C<sub>9</sub>H<sub>9</sub>OF 152.0637, found 152.0632.

HPLC (Chiracel OB, 2-propanol/hexane 10:90, flow 1 mL/min, T = 30 °C):  $t_R$  (1*S*,2*R*)-**12** 8.42 min; (1*R*,2*S*)-**8**, 11.63 min.

---

(4) S. Stayber, M. Zupan, *Tetrahedron Lett.* **1996**, 37, 3591-3594.

**(1*S*,2*R*)-2-Fluoro-1,2,3,4-tetrahydro-naphthalen-1-ol (13).**

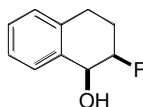

From 2-fluorotetral-1-one **11**<sup>4</sup> (328 mg, 2 mmol) and following the modified method **A** with in 4 mL 1.2:1 HCO<sub>2</sub>H/Et<sub>3</sub>N mixture and (*R,R*)-**I** as the catalyst; flash chromatography (1:7 EtOAc-hexane) gave 325 mg (98%) of **13** (94% de, 97% ee) as a white solid:  $[\alpha]_D^{20}$  -32.8 (c 1.16, CHCl<sub>3</sub>) <sup>1</sup>H NMR (500 MHz, CDCl<sub>3</sub>)  $\delta$  1.99 (m, 1H), 2.30-2.40 (m, 2H), 2.78 (dt, 1H, *J* = 17.0, 7.5 Hz), 3.03 (dtd, 1H, *J* = 17.0, 7.5, 2.0 Hz), 4.79 (d, 1H, *J*<sub>H,F</sub> = 17.5 Hz), 4.98 (ddt, 1H, *J*<sub>H,F</sub> = 50.0 Hz, *J* = 9.0, 3.0 Hz), 7.09-7.52 (m, 4H); <sup>13</sup>C NMR (125 MHz, CDCl<sub>3</sub>)  $\delta$  24.4 (d, *J*<sub>C,F</sub> = 19.9 Hz), 25.6 (d, *J*<sub>C,F</sub> = 8.9 Hz), 69.0 (*J*<sub>C,F</sub> = 19.0 Hz), 91.1 (*J*<sub>C,F</sub> = 172.5 Hz), 126.6, 128.2, 128.4, 129.2, 135.5, 135.7; <sup>19</sup>F{<sup>1</sup>H} NMR (377 MHz, CDCl<sub>3</sub>)  $\delta$  -121.5; mass spectrum (EI) *m/z* (rel intensity) 166 (M<sup>+</sup>, 14), 149 (100), 147 (45). HRMS calcd for C<sub>10</sub>H<sub>11</sub>OF 166.0794, found 166.0801.

HPLC (Chiracel OB, 2-propanol/hexane 10:90, flow 1 mL/min, T = 30 °C): *t<sub>R</sub>* *trans* isomers, 6.83 min, (1*S*,2*R*)-**13** 7.66 min; (1*R*,2*S*)-**13**, 15.95 min.

**(1*S*,2*R*)-2-Bromocyclopentan-1-ol (18).**

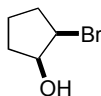

From 2-bromocyclopentanone **14**<sup>[2]</sup> (492.0 mg, 3 mmol) and following the method **B** with (*S,S*)-**I** as the catalyst; flash chromatography (1:6 EtOAc-hexane) gave 400 mg (80%) of (1*S*,2*R*)-**18** (>98% de, 45% ee) as a colorless oil:  $[\alpha]_D^{20}$  +3.9 (c 0.88, CHCl<sub>3</sub>) (>98% de, 45% ee); <sup>1</sup>H NMR (300 MHz, CDCl<sub>3</sub>): 1.50-2.25 (m, 7H), 3.99 (td, 1H, *J* = 3.9, 6.2 Hz), 4.28

(td, 1H,  $J = 3.9, 6.2$  Hz);  $^{13}\text{C}$  NMR (75 MHz,  $\text{CDCl}_3$ ): 20.6, 30.5, 32.9, 60.1, 74.7; mass spectrum (CI)  $m/z$  (rel intensity) 166 ( $\text{M}^+$ , 9), 164 ( $\text{M}^+$ , 9), 149 (4), 147 (4), 85 (100). HRMS calcd for  $\text{C}_5\text{H}_9\text{BrO}$  165.9814 and 163.9833, found 165.9816 and 163.9837.

**(1*S*,2*R*)-2-chlorocyclohexanol (19).**

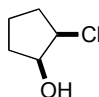

From 2-chlorocyclopentanone **15** (484 mg, 4mmol) and following the method **A** with 1.2:1  $\text{HCO}_2\text{H}/\text{Et}_3\text{N}$  mixture and (*S,S*)-**1** as the catalyst; flash chromatography (1:6 EtOAc-hexane) gave 410 mg (80%) of (1*S*,2*R*)-**19** (>98% de, 60% ee) as a light brown oil:  $^1\text{H}$  NMR (400 MHz,  $\text{CDCl}_3$ )  $\delta$  1.49-2.42 (m, 7H), 4.05-4.13 (m, 1H), 4.13-4.22 (m, 1H);  $^{13}\text{C}$  NMR (125 MHz,  $\text{CDCl}_3$ )  $\delta$  19.9, 30.2, 32.0, 65.7, 74.4. This compound was fully characterized as its benzoate.

**(1*S*,2*R*)-2-chlorocyclopentyl benzoate [(1*S*,2*R*)-22].**

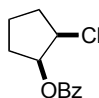

To a solution of **19** (120.5 mg, 1 mmol) in  $\text{CH}_2\text{Cl}_2$  (1 mL) was added pyridine (0.2 mL, 2.40 mmol) and benzoyl chloride (0.14 mL, 1.20 mmol). The mixture was stirred at rt for 2 h, diluted with  $\text{CH}_2\text{Cl}_2$  (10 mL) and washed with  $\text{H}_2\text{O}$  (2 x 10 mL). The organic layer was dried, concentrated, and purified by flash chromatography (1:8 EtOAc:Hexane) to yield (1*S*,2*R*)-**22** (190 mg, 80%) as a colorless oil.  $[\alpha]_D^{20} + 9.2$  (c 1.0,  $\text{CHCl}_3$ ) (>98% de, 60% ee);  $^1\text{H}$ -RMN (300 MHz,  $\text{CDCl}_3$ ): 1.60-1.80 (m, 1H), 1.95-2.32 (m, 5H), 4.40-4.55 (m, 1H), 5.25-5.40 (m, 1H), 7.43 (t, 2H,  $J = 7.5$  Hz), 7.55 (t, 1H,  $J = 7.5$  Hz), 8.07 (d, 2H,  $J = 7.5$  Hz);  $^{13}\text{C}$ -RMN (75

MHz, CDCl<sub>3</sub>): 21.8, 22.4, 27.8, 32.7, 60.9, 73.3, 128.7, 130.0, 130.5, 133.3, 166.0; mass spectrum (EI) m/z (rel intensity) 227 (M<sup>+</sup>+1, 18), 225 (58), 123 (57), 105 (100). HRMS calcd for C<sub>12</sub>H<sub>14</sub>ClO 225.0680, found 225.0682.

**(1*S*,2*R*)-2-Bromo-ciclohexanol (20).**

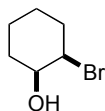

From 2-bromocyclohexanone **16**<sup>[2]</sup> (531 mg, 3 mmol) and following the method **B** with (S,S)-**I** as the catalyst; flash chromatography (1:6 EtOAc-hexane) gave 450 mg (84%) of (1*S*,2*R*)-**20** (70% de, 80% ee) as a light brown oil: [ $\alpha$ ]<sub>D</sub><sup>20</sup> -7.0 (c 0.5, CHCl<sub>3</sub>) (70% de, 80% ee); <sup>1</sup>H NMR (400 MHz, CDCl<sub>3</sub>): 1.22-1.42 (m, 2H), 1.55-2.00 (m, 5H), 2.05-2.25 (m, 2H), 3.60-3.75 (m, 1H), 4.40-4.55 (m, 1H); <sup>13</sup>C NMR (100 MHz, CDCl<sub>3</sub>): 21.6, 23.1, 31.2, 32.5, 62.2, 70.5, mass spectrum (CI) m/z (rel intensity) 179 (M<sup>+</sup>, 30), 177 (M<sup>+</sup>, 30), 161 (12), 159 (12), 99 (51), 97 (100). HRMS calcd for C<sub>6</sub>H<sub>10</sub>BrO 178.9887 and 176.9923, found 178.9894 and 176.9915.

**(1*S*,2*R*)-2-bromocyclohexyl benzoate [(1*S*,2*R*)-23].**

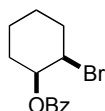

(1*S*,2*R*)-**20** (44.6 mg, 0.25 mmol) was benzyloated as described for **22** and the mixture was purified by flash chromatography (1:8 EtOAc:hexane) to yield (1*S*,2*R*)-**23** (60 mg, 85%) as a colorless oil: [ $\alpha$ ]<sub>D</sub><sup>20</sup> -5.8 (c 0.4, CHCl<sub>3</sub>) (92% de, 80% ee); <sup>1</sup>H NMR (400 MHz, CDCl<sub>3</sub>): 1.40-1.60 (m, 2H), 1.68-1.90 (m, 3H), 1.98-2.15 (m, 2H), 2.17-2.32 (m, 1H), 4.50-4.60 (m, 1H), 5.05-5.15 (m, 1H), 7.44 (t, 2H, *J* = 7.4 Hz), 7.56 (t, 1H, *J* = 7.4 Hz), 8.08 (d, 2H, *J* = 7.4 Hz); <sup>13</sup>C NMR (100 MHz, CDCl<sub>3</sub>): 22.2, 22.5, 28.3, 33.1, 54.5, 73.0, 128.4, 129.8, 130.2,



133.1, 165.7; mass spectrum (CI)  $m/z$  (rel intensity) 286 ( $M^+ + 1$ , 16), 285 (93), 284 (18), 283 (93), 203 (19), 123 (100). HRMS calcd for  $C_{13}H_{16}BrO$  285.0293, found 285.0313.

HPLC (Chiralcel OJ, 2-propanol/hexane 1:99, flow 0.5 mL/min,  $T = 30\text{ }^\circ\text{C}$ ):  $t_R$  (1*S*,2*R*)-**23**, 16.38 min; (1*R*,2*S*)-**23**, 19.86.

**(1*R*,2*S*)-2-chloro-cyclohexanol [(1*R*,2*S*)-**21**].**

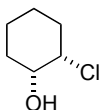

From 2-chlorocyclohexanone **17** (535 mg, 4 mmol) and following the method **A** with 1.2:1  $\text{HCO}_2\text{H}/\text{Et}_3\text{N}$  mixture and (*R,R*)-**I** as the catalyst; flash chromatography (1:6 EtOAc-hexane) gave 431 mg (79%) of (1*R*,2*S*)-**21** (78% de, 90% ee) as a light brown oil:  $[\alpha]_D^{20} + 4.5$  ( $c$  0.2,  $\text{CHCl}_3$ ) (86% de, 90% ee);  $^1\text{H}$  NMR (500 MHz,  $\text{CDCl}_3$ ): 1.22-1.42 (m, 2H), 1.55-1.83 (m, 5H), 1.97-2.08 (m, 1H), 3.75-3.83 (m, 1H), 4.22-4.31 (m, 1H);  $^{13}\text{C}$  NMR (125 MHz,  $\text{CDCl}_3$ ): 21.7, 22.4, 30.8, 32.0, 66.2, 70.7. HRMS calcd for  $\text{C}_6\text{H}_{11}\text{ClO}$  134.0497, found 134.0498.

**(1*R*,2*S*)-2-chlorocyclohexyl benzoate [(1*R*,2*S*)-**24**].**

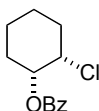

(1*R*,2*S*)-**21** (134.5 mg, 1 mmol) was benzoylated as described for **22** and the mixture was purified by flash chromatography (1:8 EtOAc:hexane) to yield (1*R*,2*S*)-**24** (190 mg, 79.7%) as a colorless oil:  $[\alpha]_D^{20} + 6.0$  ( $c$  0.5,  $\text{CHCl}_3$ ) (86% de, 90% ee);  $^1\text{H}$  NMR (300 MHz,  $\text{CDCl}_3$ ): 1.45-1.60 (m, 2H), 1.61-2.20 (m, 6H), 4.34-4.47 (m, 1H), 5.16-5.30 (m, 1H), 7.46 (t, 2H,  $J = 7.4$  Hz), 7.55 (t, 1H,  $J = 7.4$  Hz), 8.07 (d, 2H,  $J = 7.4$  Hz);  $^{13}\text{C}$  NMR (75 MHz,  $\text{CDCl}_3$ ): 21.8, 22.4, 27.8, 32.7, 60.9, 73.3, 128.7, 130.0, 130.5, 133.3, 166.0; mass spectrum (CI)  $m/z$  (rel

intensity) 239.(M<sup>+</sup>+1, 3), 203 (4), 225 (58), 123 (58), 105 (100). HRMS calcd for C<sub>13</sub>H<sub>16</sub>ClO<sub>2</sub> 239.0817, found 239.0838.

HPLC (Chiralcel OJ, 2-propanol/hexane 0.5:99.5, flow 0.5 mL/ min, T = 30 °C): t<sub>R</sub> (1*S*,2*R*)-**24**, 18.45 min; (1*R*,2*S*)-**24**, 21.77 min.
